# Supplementary material for: Early Osteogenic Marker Expression in hMSCs Cultured onto Acid Etching-Derived Micro- and Nanotopography 3D-Printed Titanium Surfaces
Source: MDPI journal article supplement (doi:10.3390/ijms23137070), 2022-06-25
Supplement: s1 [file s1]

## Supplementary Material

# Early Osteogenic Marker Expression in hMSCs Cultured onto Acid Etching-Derived Micro- and Nanotopography 3D-printed Titanium Surfaces

Nora Bloise <sup>1,2,\*</sup>, Erik I. Waldorff <sup>3</sup>, Giulia Montagna <sup>1,4</sup>, Giovanna Bruni <sup>5</sup>, Lorenzo Fassina <sup>4</sup>, Samuel Fang <sup>3</sup>, Nianli Zhang <sup>3</sup>, Jiechao Jiang <sup>6</sup>, James T. Ryaby <sup>3</sup> and Livia Visai <sup>1,2,\*</sup>

<sup>1</sup> Department of Molecular Medicine (DMM), Center for Health Technologies (CHT), UdR INSTM, University of Pavia, 27100 Pavia, Italy; nora.bloise@unipv.it; livia.visai@unipv.it; giulia.montagna04@universitadipavia.it

<sup>2</sup> Medicina Clinica-Specialistica, UOR5 Laboratorio di Nanotecnologie, ICS Maugeri, IRCCS, 27100 Pavia, Italy; nora.bloise@unipv.it; livia.visai@unipv.it

<sup>3</sup> Research and Product Development, Orthofix Medical, Inc., 3451 Plano Parkway, Lewisville, TX 75056, USA; erikwaldorff@gmail.com (E.I.W.); samuel.fang@gmail.com (S.F.); nianlizhang@orthofix.com (N.Z.); jamesryaby@msn.com (J.T.R.)

<sup>4</sup> Department of Electrical, Computer and Biomedical Engineering, Centre for Health Technologies (CHT), University of Pavia, 27100 Pavia, Italy; lorenzo.fassina@unipv.it

<sup>5</sup> C.S.G.I.-Department of Chemistry, Section of Physical Chemistry, University of Pavia, 27100 Pavia, Italy; giovanna.bruni@unipv.it

<sup>6</sup> Department of Material Science, University of Texas, Arlington, TX 76019, USA; jiangjc@uta.edu

\* Correspondence: nora.bloise@unipv.it (N.B.); livia.visai@unipv.it (L.V.)

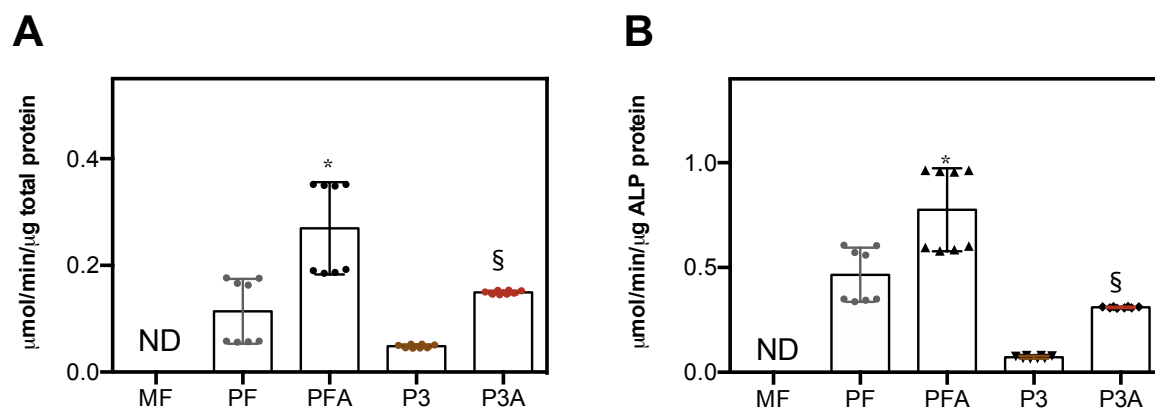

**Figure S1** Alkaline phosphatase activity. (A) ALP activity determined colorimetrically, corrected for the protein content measured with the BCA Protein Assay Kit and expressed as micromoles of *p*-nitrophenol produced per min per  $\mu\text{g}$  of total protein (B) ALP activity expressed as micromoles of *p*-nitrophenol produced per min per  $\mu\text{g}$  of ALP protein determined by ELISA assay. Statistical analysis was performed by using Student's unpaired t-test (significance level of  $p < 0.05$ ). Symbol \* means significant differences between PF and PFA (PF vs PFA) and § between P3 and P3A (P3 vs P3A). ND = Not Detectable.
